# Supplementary material for: Large-scale human skin lipidomics by quantitative, high-throughput shotgun mass spectrometry
Source: PubMed Central journal article supplement (PMC5339821; doi:10.1038/srep43761), 2017-03-07
Supplement: srep43761-s1.pdf [file srep43761-s1.pdf]

# **Large-scale human skin lipidomics by quantitative, high-throughput shotgun mass spectrometry**

Tomasz Sadowski<sup>1,2</sup>, Christian Klose<sup>2</sup>, Mathias J. Gerl<sup>2</sup>, Anna Wójcik-Maciejewicz<sup>3</sup>, Ronny Herzog<sup>2</sup>, Kai Simons<sup>2,4</sup>, Adam Reich<sup>3</sup>, Michal A. Surma<sup>2\*</sup>

<sup>1</sup>Medical Faculty, Dresden University of Technology, Dresden, Germany

<sup>2</sup>Lipotype GmbH, Dresden, Germany

<sup>3</sup>Department of Dermatology, Venerology and Allergology, University of Medicine, Wrocław, Poland.

<sup>4</sup>Max Planck Institute for Molecular Cell Biology and Genetics, Dresden, Germany

\*Correspondence and requests for materials should be addressed to MAS (email: [surma@lipotype.com](mailto:surma@lipotype.com))

| Lipid class                              | Acquisition mode | Precursor ion                                                                               | Fragment ion                   | Structural detail | Example                    | slope/r <sup>2</sup> |
|------------------------------------------|------------------|---------------------------------------------------------------------------------------------|--------------------------------|-------------------|----------------------------|----------------------|
| Cholesterol (Chol)                       | Pos FTMS         | [MC <sub>2</sub> H <sub>2</sub> O <sub>2</sub> +NH <sub>4</sub> <sup>+</sup> ] <sup>+</sup> | -                              | Class             | Chol                       | 1.05/1.00            |
| Triacylglycerol (TAG)                    | Pos FTMS/MSMS    | [M+NH <sub>4</sub> <sup>+</sup> ] <sup>+</sup>                                              | [M-FA] <sup>+</sup>            | Species           | TAG 48:2;0                 | 0.85/1.00            |
| Diacylglycerol (DAG)                     | Pos FTMS/MSMS    | [M+NH <sub>4</sub> <sup>+</sup> ] <sup>+</sup>                                              | [M-FA] <sup>+</sup>            | Sub-species       | DAG 38:2;0 (18:2;0-20:0;0) | 0.91/1.00            |
| Cholesterol esters (CE)                  | Pos FTMS/MSMS    | [M+NH <sub>4</sub> <sup>+</sup> ] <sup>+</sup>                                              | [FA-H] <sup>+</sup>            | Species           | CE 18:2;0                  | 0.89/0.99            |
| Non-hydroxy-dehydrosphingosine (NdS)     | Neg FTMS/MSMS    | [M+C <sub>2</sub> H <sub>3</sub> O <sub>2</sub> +H] <sup>-</sup>                            | [FA-H] <sup>+</sup>            | Sub-species       | NdS 44:0;2 (20:0;2-24:0;0) | nd                   |
| Non-hydroxy-sphingosine (NS)             | Neg FTMS/MSMS    | [M+C <sub>2</sub> H <sub>3</sub> O <sub>2</sub> +H] <sup>-</sup>                            | [FA-H] <sup>+</sup>            | Sub-species       | NS 44:1;2 (18:1;2-26:0;0)  | 0.96/0.99            |
| Non-hydroxy-phytosphingosine (NP)        | Neg FTMS/MSMS    | [M+C <sub>2</sub> H <sub>3</sub> O <sub>2</sub> +H] <sup>-</sup>                            | [FA-H] <sup>+</sup>            | Sub-species       | NP 46:0;3 (20:0;3-26:0;0)  | nd                   |
| Non-hydroxy-6-hydroxy-sphingosine (NH)   | Neg FTMS/MSMS    | [M+C <sub>2</sub> H <sub>3</sub> O <sub>2</sub> +H] <sup>-</sup>                            | [FA-H] <sup>+</sup>            | Sub-species       | NH 46:1;3 (18:1;3-28:0;0)  | nd                   |
| Alphahydroxy-dehydrosphingosine (AdS)    | Neg FTMS/MSMS    | [M+C <sub>2</sub> H <sub>3</sub> O <sub>2</sub> +H] <sup>-</sup>                            | [FA-H] <sup>+</sup>            | Sub-species       | AdS 44:0;3 (19:0;2-25:0;1) | nd                   |
| Alphahydroxy-sphingosine (AS)            | Neg FTMS/MSMS    | [M+C <sub>2</sub> H <sub>3</sub> O <sub>2</sub> +H] <sup>-</sup>                            | [FA-H] <sup>+</sup>            | Sub-species       | AS 44:1;3 (18:1;2-26:0;1)  | nd                   |
| Alphahydroxy-phytosphingosine (AP)       | Neg FTMS/MSMS    | [M+C <sub>2</sub> H <sub>3</sub> O <sub>2</sub> +H] <sup>-</sup>                            | [FA-H] <sup>+</sup>            | Sub-species       | AP 42:0;4 (18:0;3-24:0;1)  | nd                   |
| Alphahydroxy-6-hydroxysphingosine (AH)   | Neg FTMS/MSMS    | [M+C <sub>2</sub> H <sub>3</sub> O <sub>2</sub> +H] <sup>-</sup>                            | [FA-H] <sup>+</sup>            | Sub-species       | AH 44:1;4 (18:1;3-26:0;1)  | nd                   |
| Omegahydroxy-dehydrosphingosine (EOdS)   | Neg FTMS/MSMS    | [M+C <sub>2</sub> H <sub>3</sub> O <sub>2</sub> +H] <sup>-</sup>                            | [linoleic acid-H] <sup>+</sup> | Species           | EOdS 68:2;2                | nd                   |
| Omegahydroxy-sphingosine (EOS)           | Neg FTMS/MSMS    | [M+C <sub>2</sub> H <sub>3</sub> O <sub>2</sub> +H] <sup>-</sup>                            | [linoleic acid-H] <sup>+</sup> | Species           | EOS 68:3;2                 | 1.21/0.99            |
| Omegahydroxy-phytosphingosine (EOP)      | Neg FTMS/MSMS    | [M+C <sub>2</sub> H <sub>3</sub> O <sub>2</sub> +H] <sup>-</sup>                            | [linoleic acid-H] <sup>+</sup> | Species           | EOP 68:2;3                 | nd                   |
| Omegahydroxy-6-hydroxy-sphingosine (EOH) | Neg FTMS/MSMS    | [M+C <sub>2</sub> H <sub>3</sub> O <sub>2</sub> +H] <sup>-</sup>                            | [linoleic acid-H] <sup>+</sup> | Species           | EOH 68:3;3                 | nd                   |

**Supplementary Table 1.** Lipid classes covered by the method, with modes of their acquisition, ions used for their identification, confirmation and in MSMS-fragmentation scan. M – molecular ion, FA – fatty acid.

**Dataset 1.** Complete dataset of the lipid composition of skin samples analyzed (pmol/sample). Available as separate file (\*.xls).
